# Supplementary material
Source: publisher site journal article supplement (https://www.dovepress.com/get_supplementary_file.php?f=263559.docx)
Supplement: Supplementary file 1 [file get_supplementary_file.php]

**Supplementary figures**

**
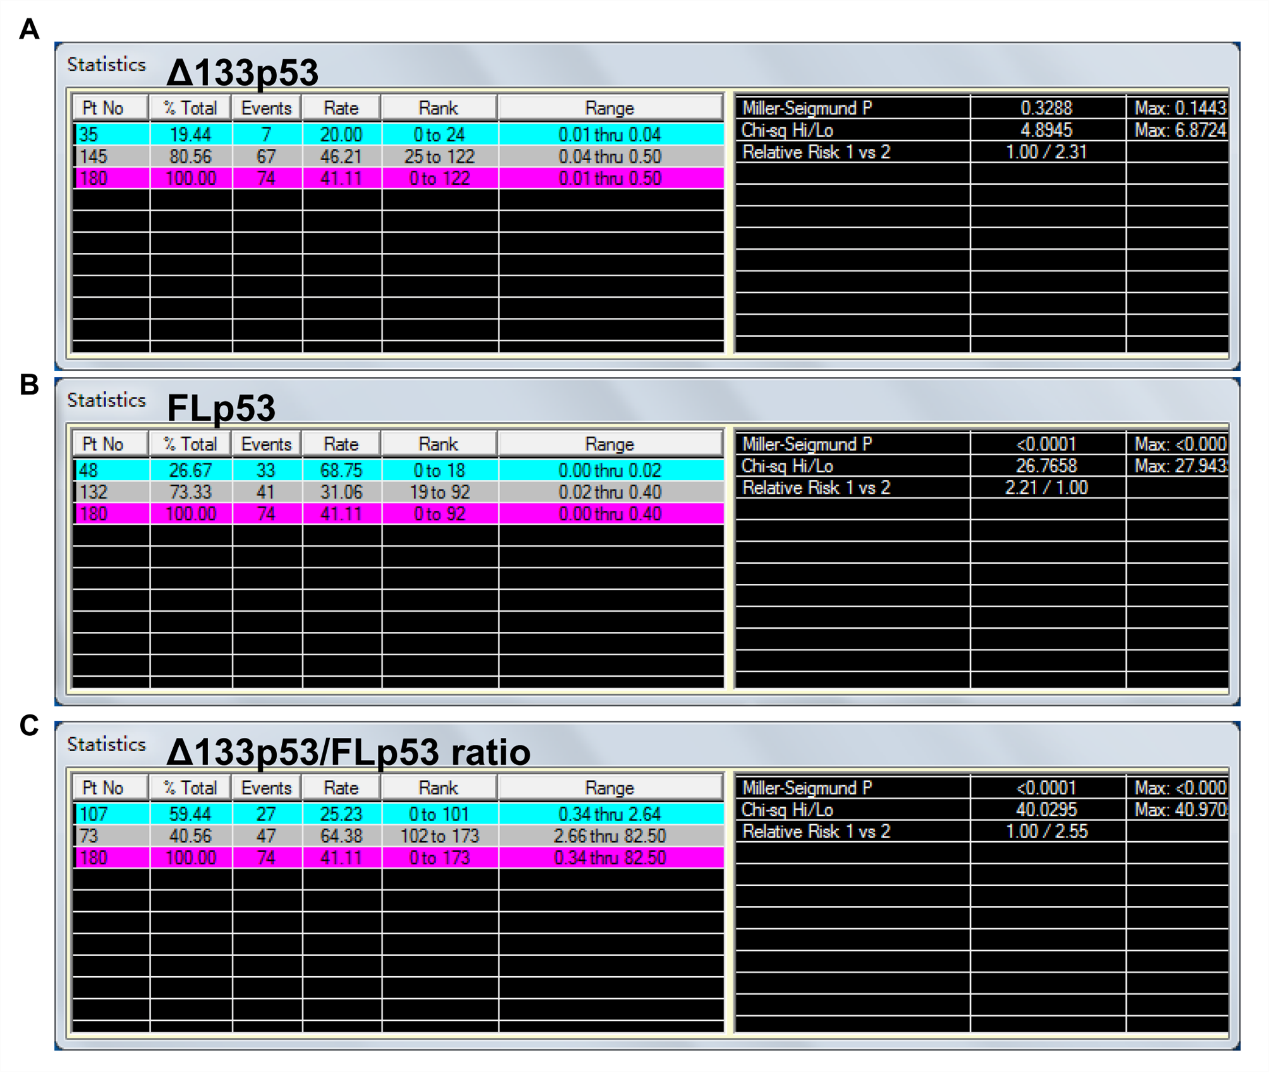
**

**Figure S1.** The optimal cutoff value of tissue Δ133p53 (**A**), FLp53 (**B**) and Δ133p53/FLp53 ratio (**C**) was selected by X-tile 3.6.1 software.


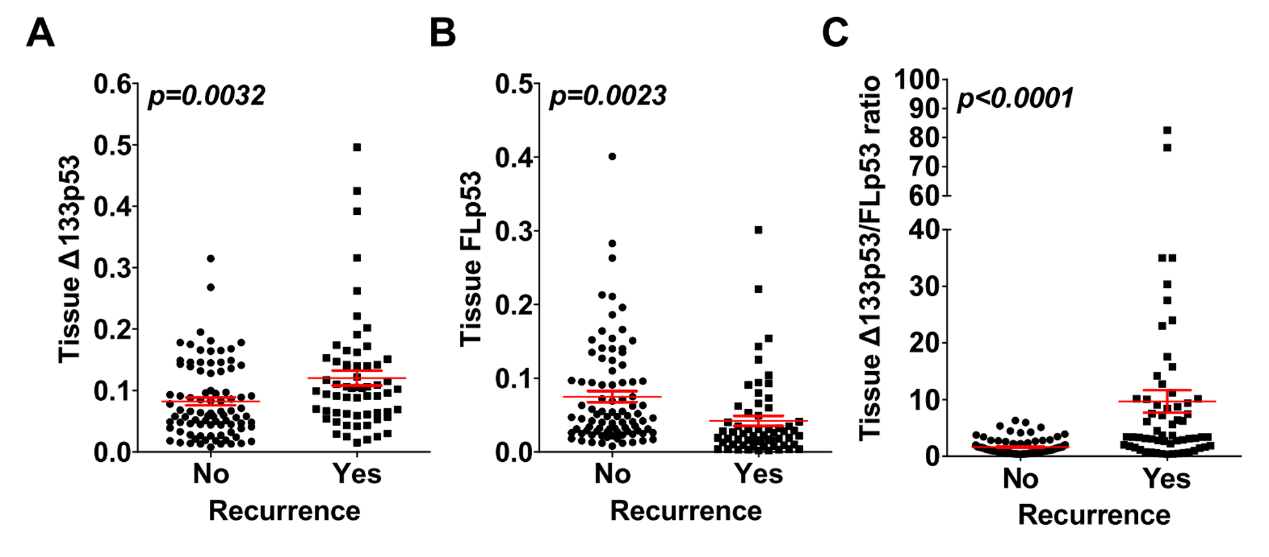


**Figure S2.** Tissue Δ133p53 (**A**) and FLp53 (**B**), Δ133p53/FLp53 ratio (**C**) in recurrent (n = 61) and non-recurrent (n = 88) ESCC patients.


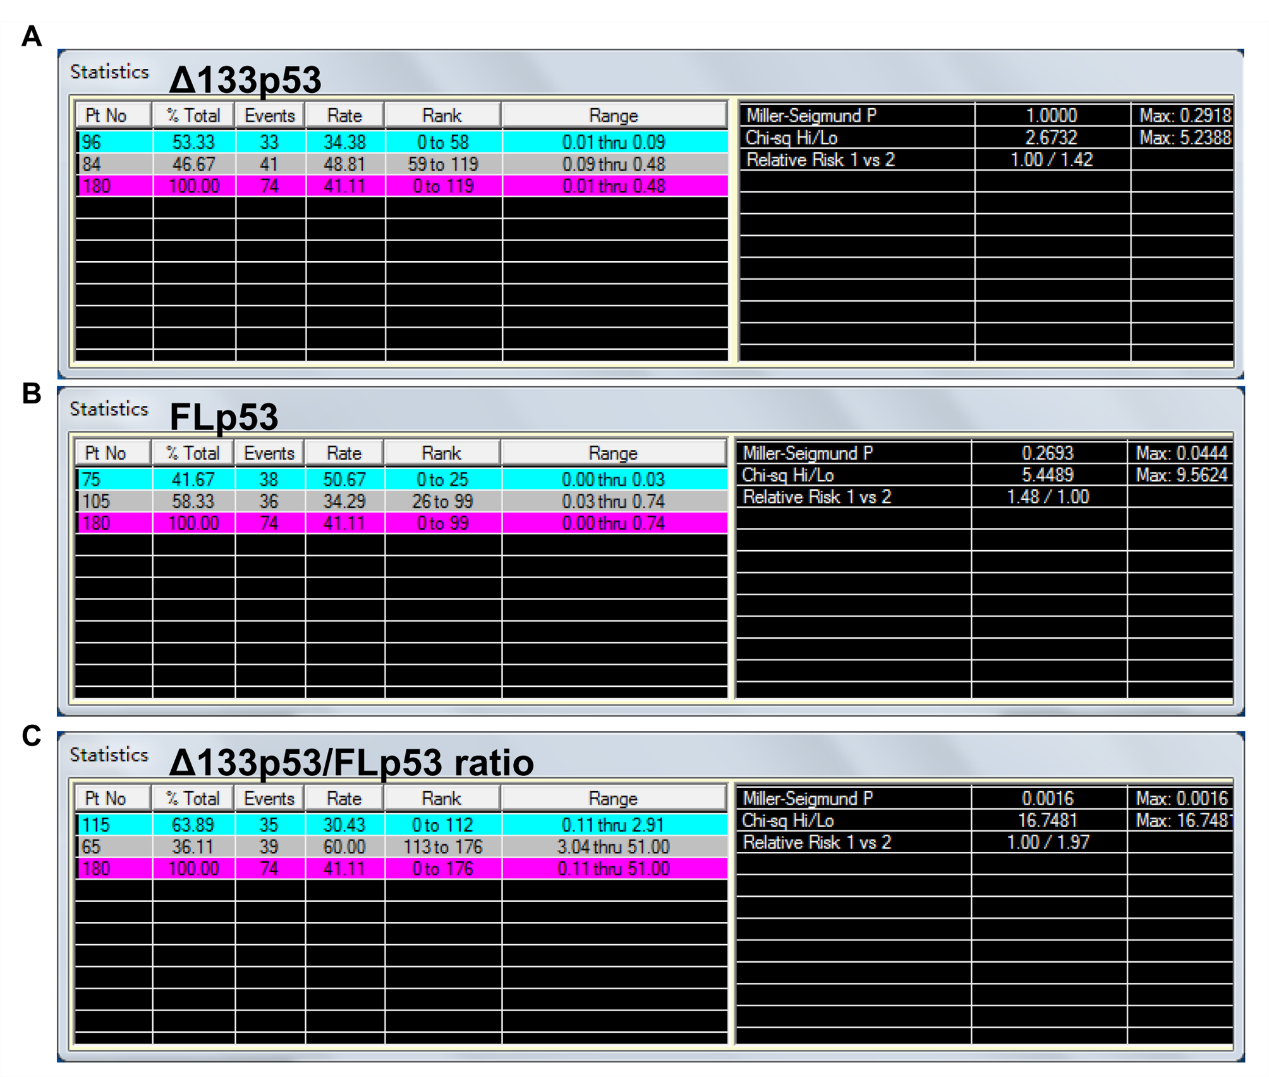


**Figure S3.** The optimal cutoff value of serum Δ133p53 (**A**), FLp53 (**B**) and Δ133p53/FLp53 ratio (**C**) was selected by X-tile 3.6.1 software.


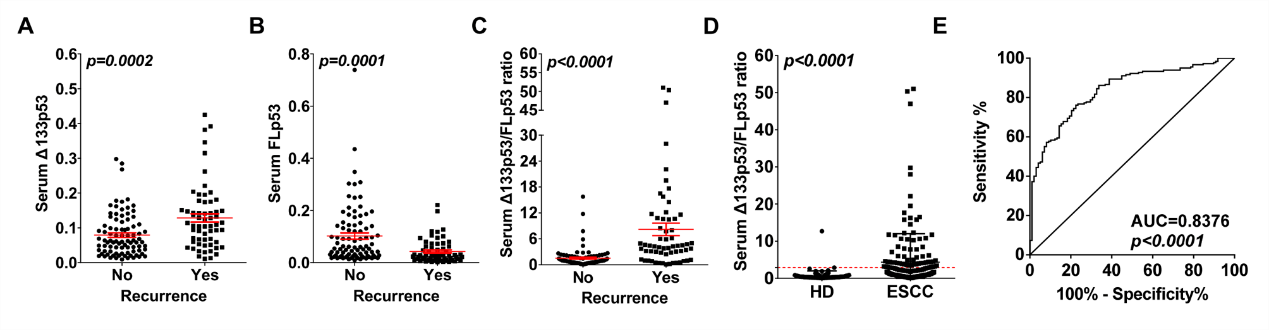


**Figure S4.** Serum Δ133p53 (**A**) and FLp53 (**B**), Δ133p53/FLp53 ratio (**C**) in recurrent (n = 61) and non-recurrent (n = 88) ESCC patients. (**D**) levels of serum Δ133p53/FLp53 ratio were measured in 98 healthy donors and compared with 180 preoperative ESCC patients. dashed line means Y = 2.1690. (**E**) The ROC curve of serum Δ133p53/FLp53 ratio in (D).
